# Supplementary material for: Inhibition of stromal cell–derived factor-1α/CXCR4 signaling restores the blood-retina barrier in pericyte-deficient mouse retinas
Source: JCI journal article supplement (doi:10.1172/jci.insight.120706), 2018-12-05
Supplement: sd1 [file 1]

Supplemental figure 1

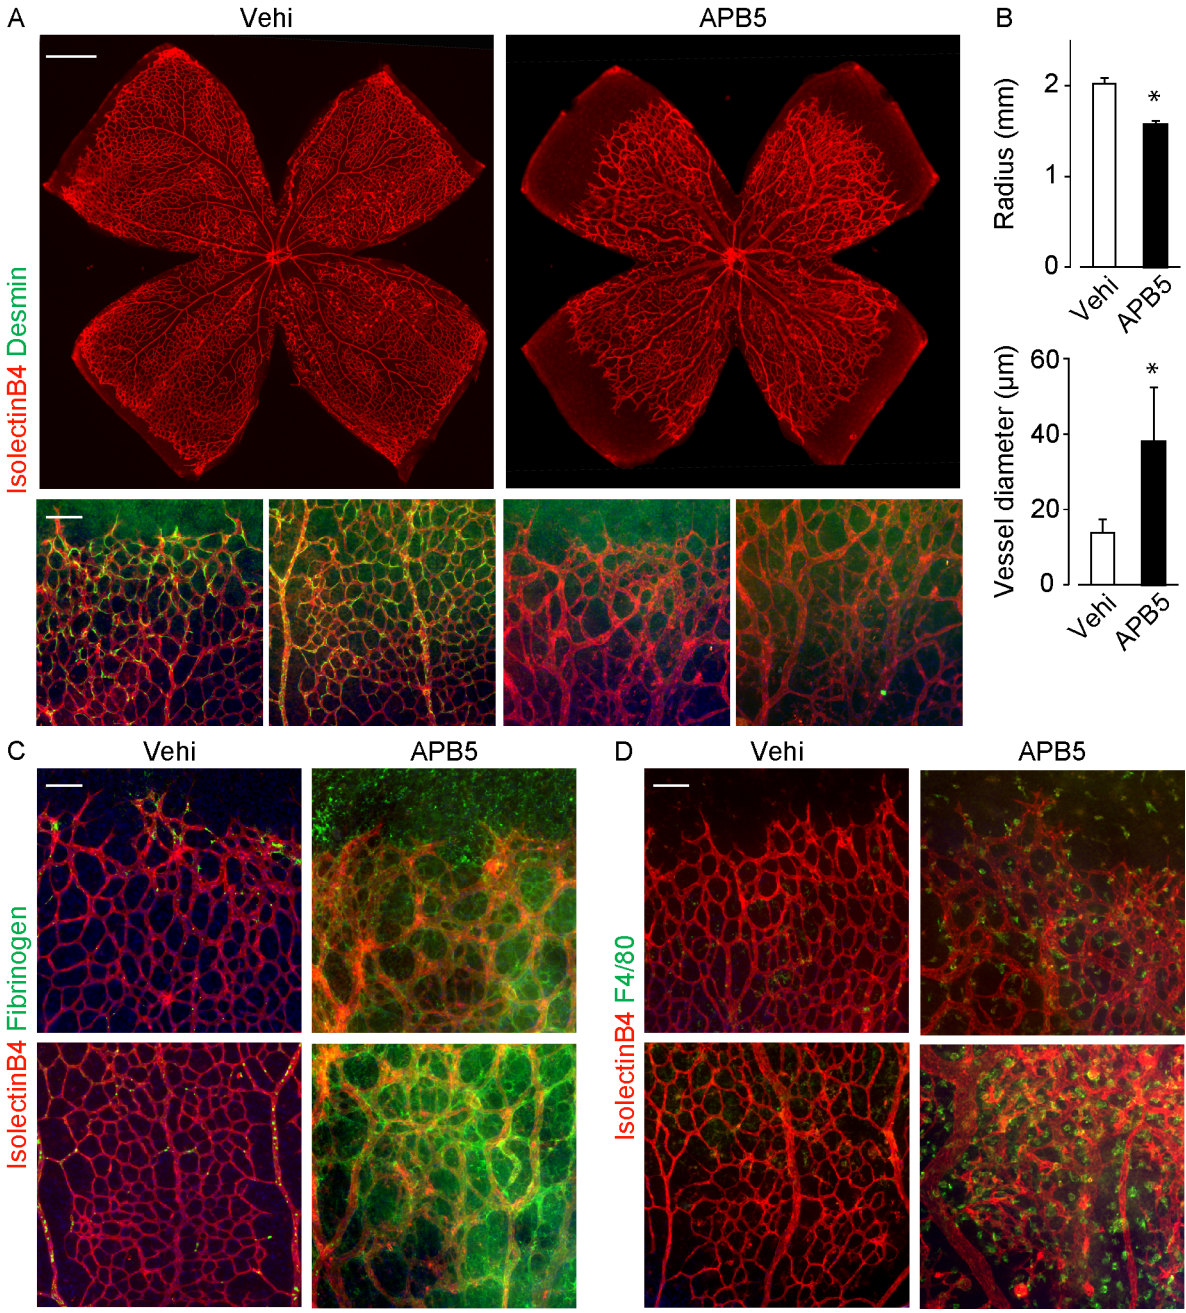

(A) Representative pictures of retina immunostaining of Isolectin B4 (red, upper panels) or Isolectin B4 (red, lower panels) and desmin (green lower panels) in P8. Scale bar, 500  $\mu\text{m}$  (upper panels) and 100  $\mu\text{m}$  (lower panels). (B) The effect of APB5 on retinal radius and vessel diameter in P8 ( $n = 6$ ). (C) Representative pictures of retina immunostaining of Isolectin B4 (red) and fibrinogen (green) in P8. Scale bar, 100  $\mu\text{m}$ . (D) Representative pictures of retina immunostaining of Isolectin B4 (red) and F4/80 (green) in P8. Scale bar, 100  $\mu\text{m}$ . \* Significantly different from the results in vehicle treated mice at  $p < 0.05$ . Data are presented as means  $\pm$  SEM.

## Supplemental figure 2

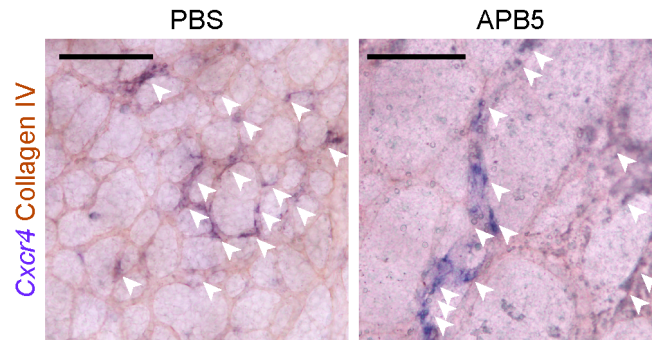

Representative pictures of retina *in situ* hybridization of *Cxcr4* (purple) and collagen IV (brown) in P8. White arrow heads indicate double positive staining region of *Cxcr4* and collagen IV.; Scale bar, 50  $\mu$ m.

### Supplemental figure 3

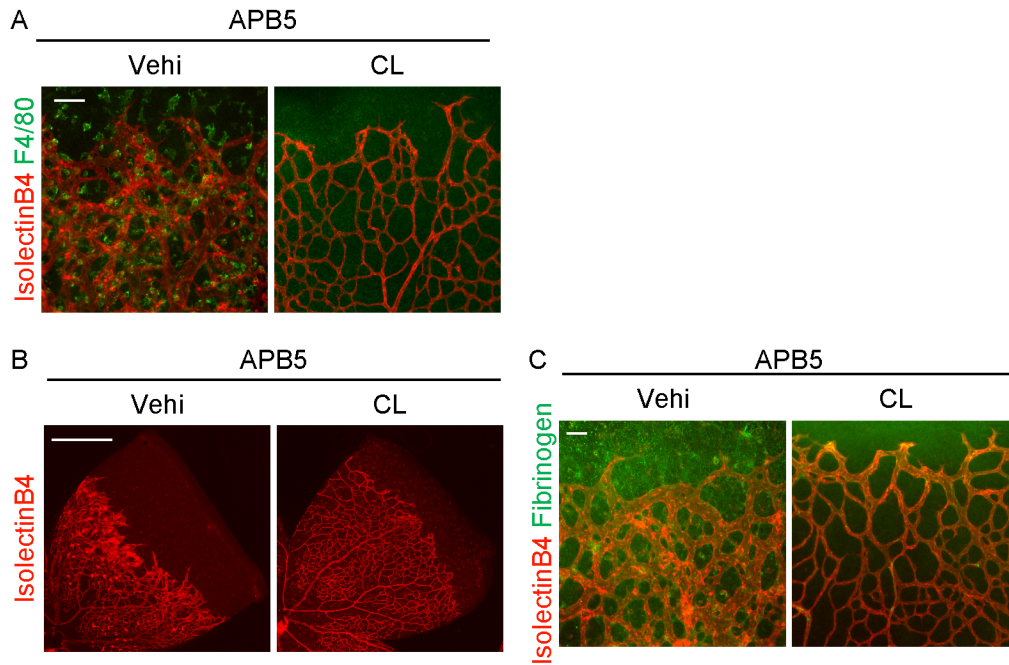

(A) Representative pictures of retina immunostaining of Isolectin B4 (red) and F4/80 (green) in P8. Scale bar, 100  $\mu$ m. (B) Representative pictures of retina immunostaining of Isolectin B4 (red) in P8. Scale bar, 100  $\mu$ m. (C) Representative pictures of retina immunostaining of Isolectin B4 (red) and fibrinogen (green) in P8. Scale bar, 100  $\mu$ m.

**Table S1. Primer sequences for PCR.**

| Target                  | Forward primer        | Reverse primer        |
|-------------------------|-----------------------|-----------------------|
| SDF-1 $\alpha$ (CXCL12) | ATGCCAGAGCCAACGTCAAG  | GGCACAGTTTGGAGTGTTGAG |
| CCL2                    | TGCCCTAAGGTCTTCAGCAC  | AAGGCATCACAGTCCGAGTC  |
| CCL7                    | TCCTCACCGCTGTTCTTTCT  | TTAGGCGTGACCATTTTACA  |
| CCL12                   | GTCCTCAGGTATTGGCTGGA  | CGGACGTGAATCTTCTGCTT  |
| CCL20                   | AAGACAGATGGCCGATGAAG  | CACCCAGTTCTGCTTTGGAT  |
| ICAM-1                  | TTCCAGCTACCATCCCAAAG  | CTTCAGAGGCAGGAAACAGG  |
| VCAM-1                  | ACAGACAGTCCCCTCAATGG  | GTCACAGCGCACAGGTAAGA  |
| E-selectin              | CGTTTGACTGTGTGGAAGGG  | ACAGGTCACAGCTTTGCATG  |
| Tbp                     | CCCCCTCTGCACTGAAATCA  | GTAGCAGCACAGAGCAAGCAA |
| 18s rRNA                | CGTTCTTAGTTGGTTGGAGCG | AACGCCACTTGTCCTCTAA   |
